# Supplementary material for: Fluorescent PCDTBT Nanoparticles with Tunable Size for Versatile Bioimaging
Source: MDPI journal article supplement (doi:10.3390/ma12152497), 2019-08-06
Supplement: s1 [file s1]

Article

# Supplementary Materials: Fluorescent PCDTBT Nanoparticles with Tunable Size for Versatile Bioimaging

Srujan Cheruku <sup>1</sup>, Lien D'Olieslaeger <sup>1</sup>, Nick Smisdom <sup>2</sup>, Joeri Smits <sup>1</sup>, Dirk Vanderzande <sup>3,4</sup>, Wouter Maes <sup>3,4</sup>, Marcel Ameloot <sup>3</sup> and Anitha Ethirajan <sup>1,4,\*</sup>

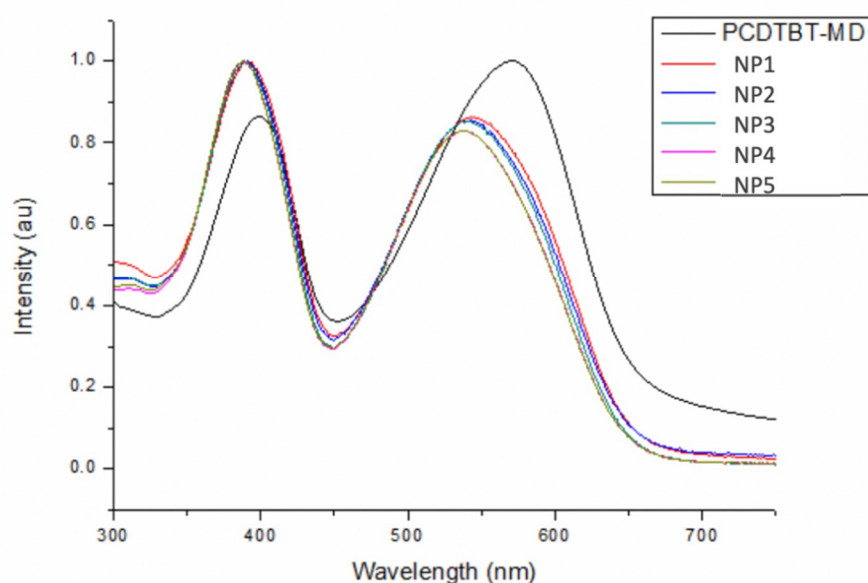

**Figure S1.** Normalized absorbance and photoluminescence spectra of molecularly dissolved PCDTBT and nanoparticles.

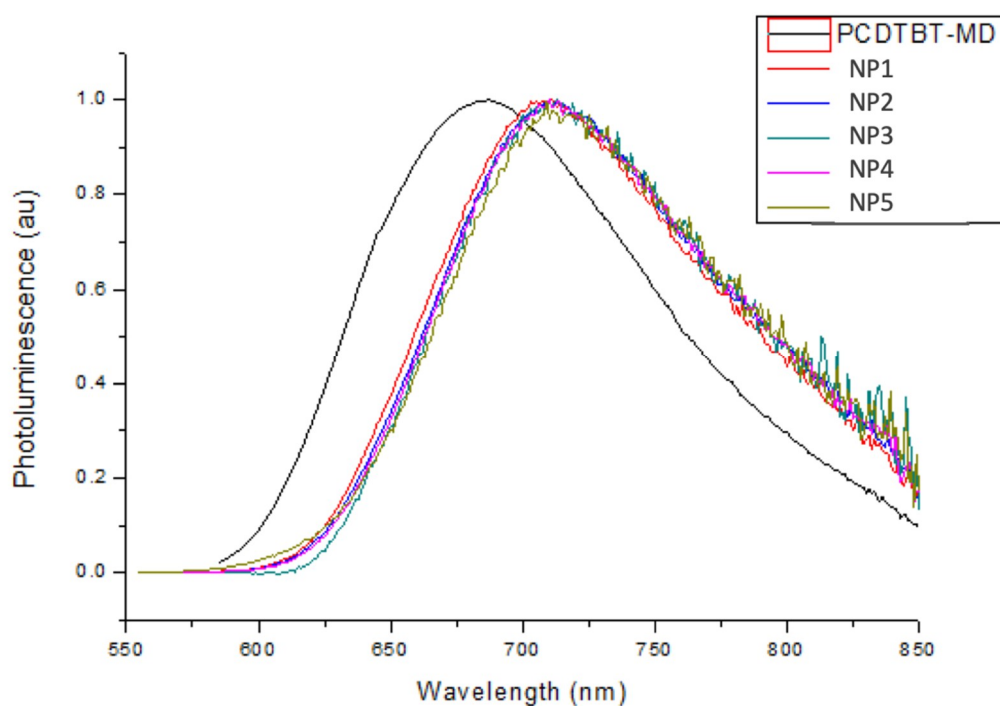

**Figure S2.** Normalized photoluminescence spectra of molecularly dissolved PCDTBT and nanoparticles.

**Video S1.** Z-stack (optical slice thickness = 1  $\mu\text{m}$ ) of **NP1** NPs incubated with A549 cells for 18 h. The NPs (green) are seen distributed within the volume of the cell.

**Video S2.** Z-stack (optical slice thickness = 1  $\mu\text{m}$ ) of **NP5** NPs incubated with A549 cells for 18 h. The NPs (green) are seen distributed within the volume of the cell.

**Table S1.** Diffusion coefficients of the PCDBT NPs in water as determined by RICS analysis with the  $\chi^2$  values of their respective fits.

| Sample | Diffusion Coefficient ( $\mu\text{m}^2/\text{s}$ ) | $\chi^2$ |
|--------|----------------------------------------------------|----------|
| NP1    | 4.95                                               | 1.41     |
| NP2    | 5.51                                               | 2.95     |
| NP3    | 6.30                                               | 1.59     |
| NP4    | 7.76                                               | 1.29     |
| NP5    | 9.98                                               | 1.66     |
